# Supplementary material for: Cu-catalyzed stereoselective conjugate addition of arylboronic acids to alkynoates
Source: Royal Society of Chemistry journal article supplement (doi:10.1039/b802231c), 2008-01-01
Supplement: b802231c.pdf [file b802231c.pdf]

# Cu-catalyzed stereoselective conjugate addition of arylboronic acids to alkynoates

Yoshihiko Yamamoto,\* Naohiro Kirai and Yu Harada

Department of Applied Chemistry, Graduate School of Science and Engineering, Tokyo Institute of Technology, Ookayama, Meguro-ku, Tokyo 152-8552, Japan. omyy@apc.titech.ac.jp

## Supplementary Information

### General Considerations.

Column chromatography was performed with silica gel (Cica silica gel 60N or Fuji Silysia FL100D) eluted with mixed solvents [hexane / ethyl acetate].  $^1\text{H}$  and  $^{13}\text{C}$  NMR spectra were measured on a Varian Gemini 2000 NMR spectrometer as  $\text{CDCl}_3$  solutions at 25 °C.  $^1\text{H}$  NMR chemical shifts are reported in terms of chemical shift ( $\delta$ , ppm) relative to the singlet at 7.26 ppm for chloroform. Splitting patterns are designated as follows: s, singlet; d, doublet; t, triplet; q, quartet; quint, quintet; sext, sextet; sept, septet; m, multiplet. Coupling constants are reported in Hz.  $^{13}\text{C}$  NMR spectra were fully decoupled and are reported in terms of chemical shift ( $\delta$ , ppm) relative to the triplet at  $\delta = 77.0$  ppm for  $\text{CDCl}_3$ . EI mass measurements were performed with a Shimadzu GCMS-QP2010 plus mass spectrometer. Elemental analyses were performed at Center for Advanced Materials Analysis of Tokyo Institute of Technology. Melting points were obtained in capillary tubes and are uncorrected. Alkynoates **1a,e**, arylboronic acids **2**, CuOAc, and MeOH were purchased and used as received. Alkynoates **1b-g** and alkynyl ketone **6** were reported in the literature (A. B. Smith, III, J. W. Leahy, I. Noda, S. W. Remiszewski, N. J. Liverton and R. Zibuck, *J. Am. Chem. Soc.*, 1992, **114**, 2995; A. Covarrubias-Zúñiga, L. S. Germán-Sánchez, L. A. Maldonado, M. Romero-Ortega and J. G. Ávila-Zárraga, *Synthesis*, **2005**, 2293; R. A. Earl and L. B. Townsend, *Org. Synth.* 1981, **60**, 81; T. Sakamoto, F. Shiga, A. Yasuhara, D. Uchiyama, Y. Kondo and H. Yamanaka, *Synthesis*, **1992**, 746; U. Appelberg, N. Mohell and U. Hacksell,

*Bioorg. Med. Chem. Lett.*, 1996, **6**, 415; L. Dufková, M. Katora and I. Císařová, *Eur. J. Org. Chem.*, **2005**, 2491; R. J. Cox, D. J. Ritson, T. A. Dane, J. Berge, J. P. H. Charmant and A. Kantacha, *Chem. Commun.*, **2005**, 1037.).

### Representative Procedure for Cu-catalyzed Addition of Arylboronic Acids to Alkynoates:

**Synthesis of Cinnamate 3aa from Alkynoate 1a and Phenylboronic acid 2a.** To a solution of methyl 2-octynoate (**1a**) (168  $\mu$ L, 1.0 mmol) and phenylboronic acid (**2a**) (366 mg, 3.0 mmol) in methanol (2.0 mL) was added CuOAc (1.23 mg, 0.01 mmol). The reaction mixture was degassed at -78 °C, and then stirred at 28 °C under Ar atmosphere for 5 h. After filtration through a pad of celite to remove insoluble materials, the filtrate was concentrated in vacuo. The residue was purified by silica gel flash column chromatography (hexane-AcOEt 150:1) to give **3aa** (214 mg, 94%) as colorless oil:  $^1\text{H}$  NMR (300 MHz,  $\text{CDCl}_3$ ):  $\delta$  0.85 (t,  $J = 7.2$  Hz, 3 H), 1.25-1.45 (m, 6 H), 3.09 (t,  $J = 7.2$  Hz, 2 H), 3.75 (s, 3 H), 6.02 (s, 1 H), 7.34-7.45 (m, 5 H);  $^{13}\text{C}$  NMR (75 MHz,  $\text{CDCl}_3$ ):  $\delta$  13.8, 22.3, 28.6, 30.9, 31.8, 51.0, 116.8, 126.8, 128.6, 128.9, 141.6, 161.5, 167.1; MS (EI):  $m/z$  (%): 232 (22) [ $\text{M}^+$ ], 201 (25) [ $\text{M}^+ - \text{OMe}$ ], 189 (24) [ $\text{M}^+ - (\text{CH}_2)_2\text{CH}_3$ ], 176 (100) [ $\text{M}^+ - \text{CH}_2=\text{CHCH}_2\text{CH}_3$ ]; EA calcd (%) for  $\text{C}_{15}\text{H}_{20}\text{O}_2$  (232.32): C 77.55, H 8.68; found: C 77.53, H 8.45.

The stereochemistry was determined by comparison of the  $^1\text{H}$  NMR data with those reported for known ethyl ester analogues (A. R. Katritzky, D. Feng and H. Lang, *J. Org. Chem.*, 1997, **62**, 715.) as shown below.

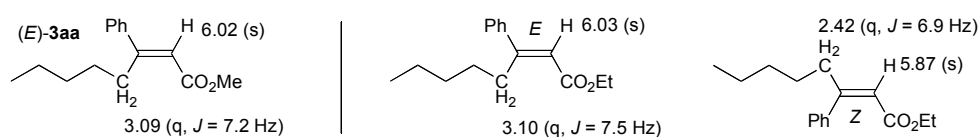

Fig. S1

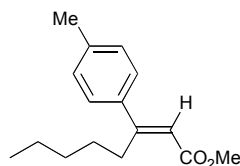

**3ab:** colorless oil;  $^1\text{H}$  NMR (300 MHz,  $\text{CDCl}_3$ ):  $\delta$  0.85 (t,  $J = 7.2$  Hz, 3 H), 1.25-1.45 (m, 6 H), 2.37 (s, 3 H), 3.08 (t,  $J = 7.2$  Hz, 2 H), 3.74 (s, 3 H), 6.02 (s, 1 H), 7.18 (d,  $J = 8.0$  Hz, 2 H), 7.34 (d,  $J = 8.0$  Hz, 2 H);  $^{13}\text{C}$  NMR (75 MHz,  $\text{CDCl}_3$ ):  $\delta$  13.8, 21.0, 22.3, 28.7, 30.7, 31.8, 50.9, 116.0, 126.7, 129.3, 138.5, 139.1, 161.4, 167.2; MS (EI):  $m/z$  (%): 246 (11) [ $\text{M}^+$ ], 215 (15) [ $\text{M}^+ - \text{OMe}$ ], 203 (7) [ $\text{M}^+ - (\text{CH}_2)_2\text{CH}_3$ ], 190 (100) [ $\text{M}^+ - \text{CH}_2=\text{CHCH}_2\text{CH}_3$ ]; EA calcd (%) for  $\text{C}_{16}\text{H}_{22}\text{O}_2$  (246.34): C 78.01, H 9.00; found: C 78.00, H 9.13.

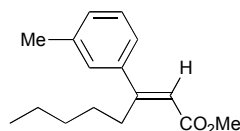

**3ac:** colorless oil;  $^1\text{H}$  NMR (300 MHz,  $\text{CDCl}_3$ ):  $\delta$  0.85 (t,  $J = 7.2$  Hz, 3 H), 1.24-1.46 (m, 6 H), 2.37 (s, 3 H), 3.07 (t,  $J = 7.2$  Hz, 2 H), 3.74 (s, 3 H), 6.00 (s, 1 H), 7.15-7.23 (m, 4 H);  $^{13}\text{C}$  NMR (75 MHz,  $\text{CDCl}_3$ ):  $\delta$  13.8, 21.2, 22.2, 28.6, 30.8, 31.7, 50.8, 116.5, 123.8, 127.4, 128.4, 129.6, 138.1, 141.5, 161.7, 167.0; MS (EI):  $m/z$  (%): 246 (24) [ $\text{M}^+$ ], 215 (21) [ $\text{M}^+ - \text{OMe}$ ], 203 (10) [ $\text{M}^+ - (\text{CH}_2)_2\text{CH}_3$ ], 190 (100) [ $\text{M}^+ - \text{CH}_2=\text{CHCH}_2\text{CH}_3$ ]; EA calcd (%) for  $\text{C}_{16}\text{H}_{22}\text{O}_2$  (246.34): C 78.01, H 9.00; found: C 77.79, H 9.19.

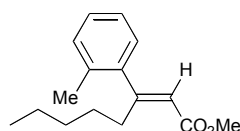

**3ad:** colorless oil;  $^1\text{H}$  NMR (300 MHz,  $\text{CDCl}_3$ ):  $\delta$  0.83 (t,  $J = 7.2$  Hz, 3 H), 1.22-1.39 (m, 6 H), 2.27 (s, 3 H), 2.93 (t,  $J = 7.2$  Hz, 2 H), 3.74 (s, 3 H), 5.70 (s, 1 H), 7.04 (d,  $J = 7.2$  Hz, 1 H), 7.13-7.22 (m, 3 H);  $^{13}\text{C}$  NMR (75 MHz,  $\text{CDCl}_3$ ):  $\delta$  13.8, 19.6, 22.3, 27.6, 31.9, 33.4, 50.9, 118.7,

125.5, 127.6, 127.7, 130.4, 134.3, 142.6, 163.2, 166.9; MS (EI):  $m/z$  (%): 246 (67) [ $M^+$ ], 231 (42) [ $M^+ - Me$ ], 215 (100) [ $M^+ - OMe$ ], 203 (38) [ $M^+ - (CH_2)_2CH_3$ ], 190 (15) [ $M^+ - CH_2=CHCH_2CH_3$ ]; EA calcd (%) for  $C_{16}H_{22}O_2$  (246.34): C 78.01, H 9.00; found: C 77.91, H 8.83.

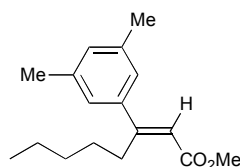

**3ae:** colorless oil;  $^1H$  NMR (300 MHz,  $CDCl_3$ ):  $\delta$  0.86 (t,  $J = 7.2$  Hz, 3 H), 1.25-1.44 (m, 6 H), 2.33 (s, 6 H), 3.06 (t,  $J = 7.2$  Hz, 2 H), 3.74 (s, 3 H), 5.99 (s, 1 H), 7.00 (s, 1 H), 7.03 (s, 2 H);  $^{13}C$  NMR (75 MHz,  $CDCl_3$ ):  $\delta$  14.0, 21.3, 22.4, 28.7, 31.0, 31.9, 60.0, 116.3, 124.5, 130.5, 137.9, 141.5, 161.9, 167.0; MS (EI):  $m/z$  (%): 260 (22) [ $M^+$ ], 229 (20) [ $M^+ - OMe$ ], 204 (100) [ $M^+ - CH_2=CHCH_2CH_3$ ]; EA calcd (%) for  $C_{17}H_{24}O_2$  (260.37): C 78.42, H 9.29; found: C 78.35, H 9.29.

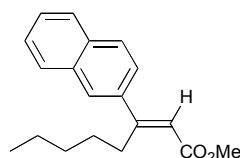

**3af:** colorless oil;  $^1H$  NMR (300 MHz,  $CDCl_3$ ):  $\delta$  0.85 (t,  $J = 7.2$  Hz, 3 H), 1.25-1.50 (m, 6 H), 3.21 (t,  $J = 7.5$  Hz, 2 H), 3.77 (s, 3 H), 6.16 (s, 1 H), 7.50 (d,  $J = 9.3$  Hz, 1 H), 7.51 (dd,  $J = 3.0, 0.6$  Hz, 1 H), 7.55 (dd,  $J = 8.4, 1.6$  Hz, 1 H), 7.82-7.91 (m, 5 H);  $^{13}C$  NMR (75 MHz,  $CDCl_3$ ):  $\delta$  13.8, 22.3, 28.7, 30.8, 31.8, 51.0, 117.2, 124.5, 126.2, 126.5, 126.7, 127.7, 128.3, 128.5, 133.3, 133.6, 138.8, 161.4, 167.1; MS (EI):  $m/z$  (%): 282 (27) [ $M^+$ ], 251 (9) [ $M^+ - OMe$ ], 226 (100) [ $M^+ - CH_2=CHCH_2CH_3$ ]; EA calcd (%) for  $C_{19}H_{22}O_2$  (282.38): C 80.82, H 7.85; found: C 80.49, H 8.03.

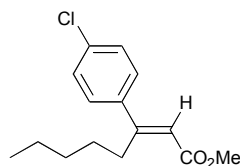

**3ag:** colorless oil;  $^1\text{H}$  NMR (300 MHz,  $\text{CDCl}_3$ ):  $\delta$  0.85 (t,  $J = 7.2$  Hz, 3 H), 1.25-1.45 (m, 6 H), 3.06 (t,  $J = 7.2$  Hz, 2 H), 3.75 (s, 3 H), 5.99 (s, 1 H), 7.35 (s, 4 H);  $^{13}\text{C}$  NMR (75 MHz,  $\text{CDCl}_3$ ):  $\delta$  13.8, 22.3, 28.5, 30.8, 31.7, 51.1, 117.2, 128.1, 128.8, 135.0, 139.9, 160.0, 166.8; MS (EI):  $m/z$  (%): 266 (21) [ $\text{M}^+$ ], 235 (15) [ $\text{M}^+ - \text{OMe}$ ], 210 (100) [ $\text{M}^+ - \text{CH}_2=\text{CHCH}_2\text{CH}_3$ ]; EA calcd (%) for  $\text{C}_{15}\text{H}_{19}\text{ClO}_2$  (266.76): C 67.54, H 7.18; found: C 67.54, H 6.89.

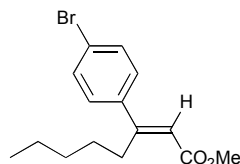

**3ah:** colorless oil;  $^1\text{H}$  NMR (300 MHz,  $\text{CDCl}_3$ ):  $\delta$  0.85 (t,  $J = 7.2$  Hz, 3 H), 1.24-1.42 (m, 6 H), 3.05 (t,  $J = 7.2$  Hz, 2 H), 3.74 (s, 3 H), 5.99 (s, 1 H), 7.29 (d,  $J = 8.5$  Hz, 2 H), 7.50 (d,  $J = 8.5$  Hz, 2 H);  $^{13}\text{C}$  NMR (75 MHz,  $\text{CDCl}_3$ ):  $\delta$  13.8, 22.3, 28.5, 30.7, 31.7, 51.1, 117.2, 123.1, 128.3, 131.8, 140.3, 160.1, 166.8; MS (EI):  $m/z$  (%): 310 (9) [ $\text{M}^+$ ], 279 (11) [ $\text{M}^+ - \text{OMe}$ ], 267 (10) [ $\text{M}^+ - (\text{CH}_2)_2\text{CH}_3$ ], 254 (100) [ $\text{M}^+ - \text{CH}_2=\text{CHCH}_2\text{CH}_3$ ]; EA calcd (%) for  $\text{C}_{15}\text{H}_{19}\text{BrO}_2$  (311.21): C 57.89, H 6.15; found: C 57.97, H 6.40.

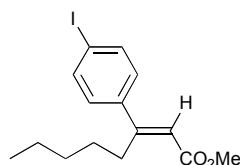

**3ai:** colorless oil;  $^1\text{H}$  NMR (300 MHz,  $\text{CDCl}_3$ ):  $\delta$  0.84 (t,  $J = 7.2$  Hz, 3 H), 1.24-1.40 (m, 6 H), 3.04 (t,  $J = 7.5$  Hz, 2 H), 3.74 (s, 3 H), 5.99 (s, 1 H), 7.16 (d,  $J = 8.5$  Hz, 2 H), 7.70 (d,  $J = 8.5$  Hz, 2 H);  $^{13}\text{C}$  NMR (75 MHz,  $\text{CDCl}_3$ ):  $\delta$  13.8, 22.2, 28.5, 30.6, 31.7, 51.1, 94.8, 117.2, 128.5,

137.7, 140.9, 160.2, 166.7; MS (EI):  $m/z$  (%): 358 (13) [ $M^+$ ], 327 (6) [ $M^+ - OMe$ ], 315 (6) [ $M^+ - (CH_2)_2CH_3$ ], 302 (100) [ $M^+ - CH_2=CHCH_2CH_3$ ]; EA calcd (%) for  $C_{15}H_{19}IO_2$  (358.21): C 50.29, H 5.35; found: C 50.27, H 5.47.

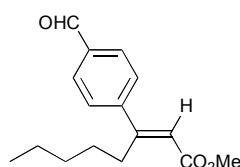

**3aj:** colorless oil;  $^1H$  NMR (300 MHz,  $CDCl_3$ ):  $\delta$  0.84 (t,  $J = 7.2$  Hz, 3 H), 1.24-1.45 (m, 6 H), 3.10 (t,  $J = 7.2$  Hz, 2 H), 3.77 (s, 3 H), 6.06 (s, 1 H), 7.57 (d,  $J = 8.4$  Hz, 2 H), 7.89 (d,  $J = 8.4$  Hz, 2 H), 10.04 (s, 1 H);  $^{13}C$  NMR (75 MHz,  $CDCl_3$ ):  $\delta$  13.8, 22.2, 28.4, 30.8, 31.6, 51.1, 118.6, 127.2, 129.8, 136.3, 147.4, 159.6, 166.3, 191.4; MS (EI):  $m/z$  (%): 260 (31) [ $M^+$ ], 229 (18) [ $M^+ - OMe$ ], 217 (25) [ $M^+ - (CH_2)_2CH_3$ ], 204 (100) [ $M^+ - CH_2=CHCH_2CH_3$ ]; EA calcd (%) for  $C_{16}H_{20}O_3$  (260.33): C 73.82, H 7.74; found: C 73.46, H 8.09.

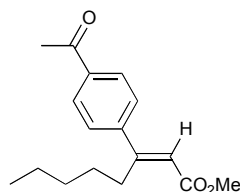

**3ak:** colorless oil;  $^1H$  NMR (300 MHz,  $CDCl_3$ ):  $\delta$  0.84 (t,  $J = 7.2$  Hz, 3 H), 1.24-1.44 (m, 6 H), 2.62 (s, 3 H), 3.10 (t,  $J = 7.2$  Hz, 2 H), 3.76 (s, 3 H), 6.05 (s, 1 H), 7.50 (d,  $J = 8.4$  Hz, 2 H), 7.96 (d,  $J = 8.4$  Hz, 2 H);  $^{13}C$  NMR (75 MHz,  $CDCl_3$ ):  $\delta$  13.8, 22.2, 26.5, 28.4, 30.7, 31.6, 51.1, 118.2, 126.8, 128.5, 137.0, 145.9, 159.8, 166.4, 197.2; MS (EI):  $m/z$  (%): 274 (35) [ $M^+$ ], 259 (11) [ $M^+ - Me$ ], 243 (11) [ $M^+ - OMe$ ], 231 (15) [ $M^+ - (CH_2)_2CH_3$ ], 218 (59) [ $M^+ - CH_2=CHCH_2CH_3$ ], 203 (100) [ $M^+ - (CH_2)_3CH_3$ ]; EA calcd (%) for  $C_{17}H_{22}O_3$  (274.35): C 74.42, H 8.08; found: C 74.13, H 8.36.

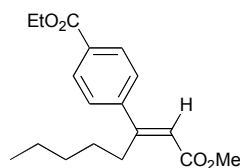

**3al:** colorless oil;  $^1\text{H}$  NMR (300 MHz,  $\text{CDCl}_3$ ):  $\delta$  0.84 (t,  $J = 7.2$  Hz, 3 H), 1.24-1.44 (m, 6 H), 1.40 (t,  $J = 7.2$  Hz, 3 H), 3.10 (t,  $J = 7.2$  Hz, 2 H), 3.76 (s, 3 H), 4.39 (q,  $J = 7.2$  Hz, 2 H), 6.04 (s, 1 H), 7.47 (d,  $J = 8.8$  Hz, 2 H), 8.04 (d,  $J = 8.8$  Hz, 2 H);  $^{13}\text{C}$  NMR (75 MHz,  $\text{CDCl}_3$ ):  $\delta$  13.9, 14.3, 22.3, 28.5, 30.9, 31.7, 51.2, 61.1, 118.1, 126.7, 129.7, 130.7, 145.8, 160.1, 166.1, 166.5; MS (EI):  $m/z$  (%): 304 (15) [ $\text{M}^+$ ], 275 (17) [ $\text{M}^+ - \text{Et}$ ], 273 (14) [ $\text{M}^+ - \text{OMe}$ ], 259 (17) [ $\text{M}^+ - \text{OEt}$ ], 248 (100) [ $\text{M}^+ - \text{CH}_2=\text{CHCH}_2\text{CH}_3$ ]; EA calcd (%) for  $\text{C}_{18}\text{H}_{24}\text{O}_4$  (304.38): C 71.03, H 7.95; found: C 70.81, H 8.17.

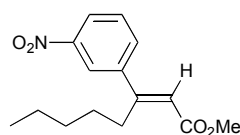

**3am:** colorless oil;  $^1\text{H}$  NMR (300 MHz,  $\text{CDCl}_3$ ):  $\delta$  0.85 (t,  $J = 7.2$  Hz, 3 H), 1.24-1.45 (m, 6 H), 3.12 (t,  $J = 7.2$  Hz, 2 H), 3.78 (s, 3 H), 6.08 (s, 1 H), 7.57 (t,  $J = 8.0$  Hz, 1 H), 7.74 (ddd,  $J = 8.0, 1.8, 1.2$  Hz, 1 H), 8.22 (ddd,  $J = 8.0, 2.1, 0.9$  Hz, 1 H), 8.28 (t,  $J = 2.1$  Hz, 1 H);  $^{13}\text{C}$  NMR (75 MHz,  $\text{CDCl}_3$ ):  $\delta$  13.7, 22.2, 28.3, 30.7, 31.6, 51.2, 119.0, 121.6, 123.5, 129.7, 132.6, 143.2, 148.5, 158.4, 166.3; MS (EI):  $m/z$  (%): 277 (12) [ $\text{M}^+$ ], 260 (100) [ $\text{M}^+ - \text{OH}$ ], 246 (20) [ $\text{M}^+ - \text{OMe}$ ], 221 (55) [ $\text{M}^+ - \text{CH}_2=\text{CHCH}_2\text{CH}_3$ ]; EA calcd (%) for  $\text{C}_{15}\text{H}_{19}\text{NO}_4$  (277.32): C 64.97, H 6.91, N 5.05; found: C 64.77, H 7.16, N 4.97.

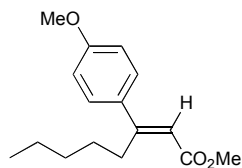

**3an:** colorless oil;  $^1\text{H}$  NMR (300 MHz,  $\text{CDCl}_3$ ):  $\delta$  0.85 (t,  $J = 7.2$  Hz, 3 H), 1.25-1.46 (m, 6 H), 3.07 (t,  $J = 7.2$  Hz, 2 H), 3.74 (s, 3 H), 3.83 (s, 3 H), 6.00 (s, 1 H), 6.90 (d,  $J = 8.8$  Hz, 2 H), 7.41 (d,  $J = 8.8$  Hz, 2 H);  $^{13}\text{C}$  NMR (75 MHz,  $\text{CDCl}_3$ ):  $\delta$  13.9, 22.4, 28.9, 30.6, 31.9, 50.9, 55.2, 113.8, 114.9, 127.9, 133.3, 160.3, 160.7, 167.0; MS (EI):  $m/z$  (%): 262 (16) [ $\text{M}^+$ ], 231 (13) [ $\text{M}^+ - \text{OMe}$ ], 206 (100) [ $\text{M}^+ - \text{CH}_2=\text{CHCH}_2\text{CH}_3$ ]; EA calcd (%) for  $\text{C}_{16}\text{H}_{22}\text{O}_3$  (262.34): C 73.25, H 8.45; found: C 73.22, H 8.64.

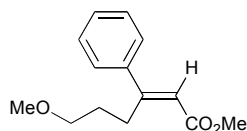

**3ba:** colorless oil:  $^1\text{H}$  NMR (300 MHz,  $\text{CDCl}_3$ ):  $\delta$  1.67-1.77 (m, 2 H), 3.16 (t,  $J = 7.5$  Hz, 2 H), 3.28 (s, 3 H), 3.40 (t,  $J = 6.6$  Hz, 2 H), 3.75 (s, 3 H), 6.06 (s, 1 H), 7.34-7.47 (m, 5 H);  $^{13}\text{C}$  NMR (75 MHz,  $\text{CDCl}_3$ ):  $\delta$  27.6, 28.8, 51.0, 58.3, 72.2, 116.9, 126.6, 128.5, 128.9, 140.9, 160.4, 166.7; MS (EI):  $m/z$  (%): 234 (0.4) [ $\text{M}^+$ ], 202 (9) [ $\text{M}^+ - \text{HOMe}$ ], 189 (6) [ $\text{M}^+ - \text{CH}_2\text{OMe}$ ], 176 (100) [ $\text{M}^+ - \text{CH}_2=\text{CHOMe}$ ]; EA calcd (%) for  $\text{C}_{14}\text{H}_{18}\text{O}_3$  (234.29): C 71.77, H 7.74; found: C 71.71, H 7.85

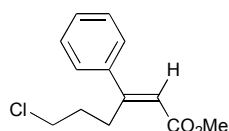

**3ca:** colorless oil:  $^1\text{H}$  NMR (300 MHz,  $\text{CDCl}_3$ ):  $\delta$  1.87-1.98 (m, 2 H), 3.25 (t,  $J = 7.5$  Hz, 2 H), 3.56 (t,  $J = 6.6$  Hz, 2 H), 3.76 (s, 3 H), 6.10 (s, 1 H), 7.37-7.45 (m, 5 H);  $^{13}\text{C}$  NMR (75 MHz,  $\text{CDCl}_3$ ):  $\delta$  28.5, 31.8, 44.7, 51.1, 117.6, 126.6, 128.6, 129.2, 140.5, 159.1, 166.7; MS (EI):  $m/z$



(%): 238 (91) [ $M^+$ ], 207 (35) [ $M^+ - OMe$ ], 189 (100) [ $M^+ - CH_2Cl$ ], 176 (81) [ $M^+ - CH_2=CHCl$ ];

EA calcd (%) for  $C_{13}H_{15}ClO_2$  (238.71): C 65.41, H 6.33; found: C 65.59, H 6.15.

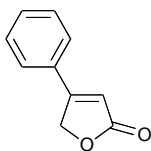

**5:** colorless solid (mp. 92-93 °C, lit. mp. 91-93 °C: T. Taniguchi, H. Nagata, R. M. Kanada, K. Kadota, M. Tekeuchi and K. Ogasawara, *Heterocycles*, 2000, **52**, 67.);  $^1H$  NMR (300 MHz,  $CDCl_3$ ):  $\delta$  5.24 (d,  $J = 1.8$  Hz, 2 H), 6.39 (t,  $J = 1.8$  Hz, 1 H), 7.46-7.52 (m, 5 H);  $^{13}C$  NMR (75 MHz,  $CDCl_3$ ):  $\delta$  71.0, 113.0, 126.4, 129.3, 129.6, 131.7, 163.9, 173.8.

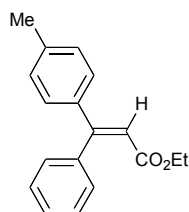

**3eb:** colorless oil (known compound: N. Kamigata, A. Satoh and M. Yoshida, *Phosphorus, Sulfur, and Silicon*, 1989, **46**, 121.);  $^1H$  NMR (300 MHz,  $CDCl_3$ ):  $\delta$  1.10 (t,  $J = 7.2$  Hz, 3 H), 2.35 (s, 3 H), 4.04 (q,  $J = 7.2$  Hz, 2 H), 6.35 (s, 1 H), 7.12-7.39 (m, 9 H);  $^{13}C$  NMR (75 MHz,  $CDCl_3$ ):  $\delta$  13.8, 55.2, 59.8, 113.8, 115.4, 127.9, 128.0, 129.1, 129.8, 133.2, 139.4, 156.3, 160.9, 166.4.

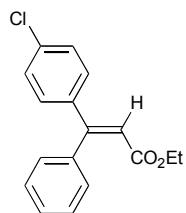

**3eg:** colorless solid (mp. 40-42 °C);  $^1\text{H}$  NMR (300 MHz,  $\text{CDCl}_3$ ):  $\delta$  1.10 (t,  $J = 7.2$  Hz, 3 H), 4.05 (q,  $J = 7.2$  Hz, 2 H), 6.33 (s, 1 H), 7.17-7.40 (m, 9 H);  $^{13}\text{C}$  NMR (75 MHz,  $\text{CDCl}_3$ ):  $\delta$  13.9, 60.0, 117.7, 127.9, 128.2, 128.5, 129.0, 129.4, 135.4, 138.4, 139.2, 154.9, 165.7.; MS (EI):  $m/z$  (%): 286 (69) [ $\text{M}^+$ ], 257 (19) [ $\text{M}^+ - \text{Et}$ ], 241 (100) [ $\text{M}^+ - \text{OEt}$ ], 214 (77) [ $\text{M}^+ - \text{CH}_2=\text{CH}_2 - \text{CO}_2$ ]; EA calcd (%) for  $\text{C}_{17}\text{H}_{15}\text{ClO}_2$  (286.75): C 71.20, H 5.27; found: C 71.22, H 5.00.

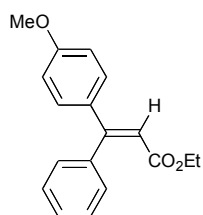

(E)-**3en:** colorless oil (known compound: N. Kamigata, A. Satoh and M. Yoshida, *Phosphorus, Sulfur, and Silicon*, 1989, **46**, 121.);  $^1\text{H}$  NMR (300 MHz,  $\text{CDCl}_3$ ):  $\delta$  1.10 (t,  $J = 7.2$  Hz, 3 H), 3.81 (s, 3 H), 4.03 (q,  $J = 7.2$  Hz, 2 H), 6.31 (s, 1 H), 6.83 (d,  $J = 8.7$  Hz, 2 H), 7.25 (d,  $J = 8.7$  Hz, 2 H), 7.18-7.40 (m, 5 H);  $^{13}\text{C}$  NMR (75 MHz,  $\text{CDCl}_3$ ):  $\delta$  14.0, 55.3, 59.8, 113.7, 115.3, 127.8, 127.9, 129.0, 129.7, 133.1, 139.2, 156.2, 160.7, 166.2.

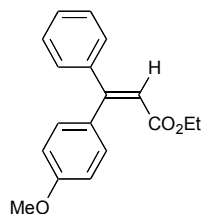

(Z)-**3fa:** colorless oil (known compound: N. Kamigata, A. Satoh and M. Yoshida, *Phosphorus, Sulfur, and Silicon*, 1989, **46**, 121.);  $^1\text{H}$  NMR (300 MHz,  $\text{CDCl}_3$ ):  $\delta$  1.17 (t,  $J = 7.2$  Hz, 3 H),

3.84 (s, 3 H), 4.09 (q,  $J = 7.2$  Hz, 2 H), 6.27 (s, 1 H), 6.90 (d,  $J = 8.8$  Hz, 2 H), 7.16 (d,  $J = 8.8$  Hz, 2 H), 7.28-7.37 (m, 5 H);  $^{13}\text{C}$  NMR (75 MHz,  $\text{CDCl}_3$ ):  $\delta$  13.9, 55.1, 59.9, 113.2, 116.9, 128.3, 128.6, 129.3, 131.0, 131.1, 141.6, 156.6, 159.8, 166.4.

The spectral data for (*E*)-**3en** and (*Z*)-**3fa** were in good agreement with those reported for the known compounds (N. Kamigata, A. Satoh and M. Yoshida, *Phosphorus, Sulfur, and Silicon*, 1989, **46**, 121.) as shown below.

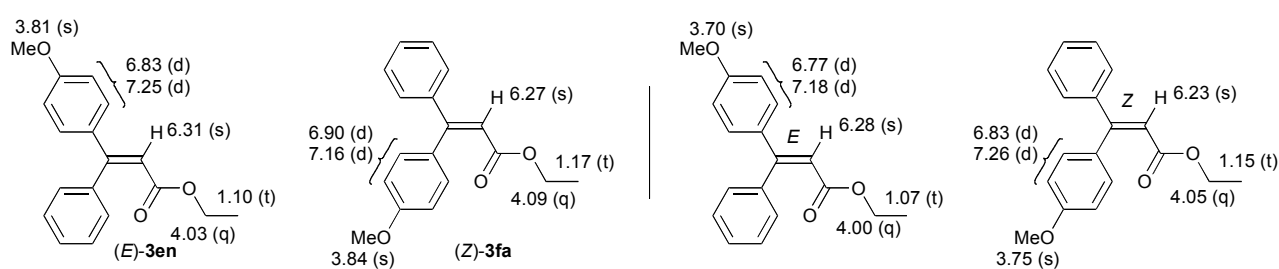

Fig. S2

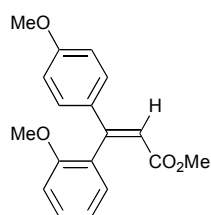

**3gn**: colorless solid (mp. 109-111 °C);  $^1\text{H}$  NMR (300 MHz,  $\text{CDCl}_3$ ):  $\delta$  3.58 (s, 3 H), 3.70 (s, 3 H), 3.80 (s, 3 H), 6.41 (s, 1 H), 6.83 (d,  $J = 9.0$  Hz, 2 H), 6.94-7.10 (m, 2 H), 7.28 (d,  $J = 9.0$  Hz, 2 H), 7.33-7.40 (m, 2 H);  $^{13}\text{C}$  NMR (75 MHz,  $\text{CDCl}_3$ ):  $\delta$  51.0, 55.2, 55.6, 111.0, 113.7, 115.4, 120.3, 128.2, 128.8, 129.2, 129.9, 132.3, 153.1, 156.5, 160.6, 166.3.; MS (EI):  $m/z$  (%): 298 (60) [ $\text{M}^+$ ], 267 (83) [ $\text{M}^+ - \text{OMe}$ ], 252 (15) [ $\text{M}^+ - \text{OMe} - \text{Me}$ ], 225 (100) [ $\text{MH}^+ - \text{Me} - \text{CO}_2\text{Me}$ ]; EA calcd (%) for  $\text{C}_{18}\text{H}_{18}\text{O}_4$  (298.33): C 72.47, H 6.08; found: C 72.46, H 6.14.

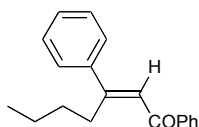

**7**: pale-yellow oil;  $^1\text{H}$  NMR (300 MHz,  $\text{CDCl}_3$ ): (*E*)-isomer: 0.88 (t,  $J = 7.2$  Hz, 3 H), 1.34-1.49 (m, 4 H), 3.06 (t,  $J = 7.2$  Hz, 2 H), 7.04 (s, 1 H), 7.39-7.58 (m, 8 H), 7.97-8.00 (m, 2 H); (*Z*)-isomer: 0.91 (t,  $J = 7.2$  Hz, 3 H), 1.34-1.51 (m, 4 H), 2.59 (t,  $J = 7.2$  Hz, 2 H), 6.66 (s, 1 H), 7.12-7.47 (m, 8 H), 7.80-7.84 (m, 2 H);  $^{13}\text{C}$  NMR (75 MHz,  $\text{CDCl}_3$ ): (*E*)-isomer:  $\delta$  13.7, 22.8, 31.1, 31.4, 122.4, 126.9, 128.3, 128.6, 128.7, 129.0, 132.6, 139.5, 142.1, 160.4, 191.7; (*Z*)-isomer:  $\delta$  13.7, 22.2, 29.8, 39.6, 123.6, 127.7, 127.8, 128.1, 128.3, 128.8, 132.5, 138.3, 140.2, 157.2, 193.5; MS (EI):  $m/z$  (%): 264 (35) [ $\text{M}^+$ ], 235 (20) [ $\text{M}^+ - \text{CH}_2\text{CH}_3$ ], 221 (100) [ $\text{M}^+ - (\text{CH}_2)_2\text{CH}_3$ ], 207 (50) [ $\text{M}^+ - (\text{CH}_2)_3\text{CH}_3$ ]; EA calcd (%) for  $\text{C}_{19}\text{H}_{20}\text{O}$  (264.36): C 86.32, H 7.63; found: C 86.35, H 7.26.

The stereochemistry of (*E*)- and (*Z*)-**7** was assigned by comparison of their  $^1\text{H}$  NMR data with those reported for both stereoisomers of dyprnone (L. E. Friedrich, N. L. de Vera and Y.-S. P. Lam, *J. Org. Chem.*, 1978, **43**, 34.) as shown below. The allylic and vinylic protons of the (*E*)-isomers resonate at lower fields than those of the corresponding (*Z*)-isomers.

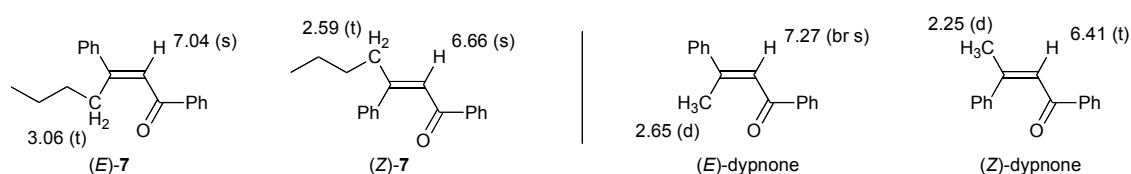

Fig. S3

### Procedure for Cu-catalyzed Addition of Phenylboronic Acid **2a** to Alkynoate **1a** in MeOD.

To a solution of methyl 2-octynoate (**1a**) (168  $\mu\text{L}$ , 1.0 mmol) and phenylboronic acid (**2a**) (183 mg, 1.5 mmol) in methanol- $d_1$  (2.0 mL) was added CuOAc (1.23 mg, 0.01 mmol). The reaction mixture was degassed at  $-78$   $^\circ\text{C}$ , and then stirred at  $28$   $^\circ\text{C}$  under Ar atmosphere for 24 h. After

filtration through a pad of celite to remove insoluble materials, the filtrate was concentrated in vacuo. The residue was purified by silica gel flash column chromatography (hexane-AcOEt 150:1) to give **3aa/3aa-*d*<sub>1</sub>** (175 mg, 74%) as colorless oil. The reaction of **1a** with 2-phenyl-5,5-dimethyl-1,3,2-dioxaborinane (**10**) was carried out with a catalyst loading of 5 mol% otherwise under the same conditions to give **3aa/3aa-*d*<sub>1</sub>** (181 mg, 78%). The D contents were estimated from the integral ratio of the singlet at  $\delta$  6.02 ppm corresponding to the residual vinylic proton relative to that of the singlet of the methoxy group at  $\delta$  3.75 ppm in the <sup>1</sup>H NMR spectra. The vinylic carbon bearing a D atom was observed at  $\delta$  116.4 ppm as a triplet ( $J_{C-D}$  = 24.2 Hz) in the <sup>13</sup>C NMR spectra.

**Procedure for Cu-catalyzed Addition of Triphenylboroxin to Alkynoate 1a.** To a solution of methyl 2-octynoate (**1a**) (168  $\mu$ L, 1.0 mmol) and triphenylboroxin (312 mg, 1.0 mmol) in methanol (2.0 mL) was added CuOAc (1.25 mg, 0.01 mmol). The reaction mixture was degassed at -78 °C, and then stirred at 28 °C under Ar atmosphere for 10 h. After filtration through a pad of celite to remove insoluble materials, the filtrate was concentrated in vacuo. The residue was purified by silica gel flash column chromatography (hexane-AcOEt 150:1) to give **3aa** (215 mg, 94%) as colorless oil.
